# Supplementary material for: An ERK-Dependent Feedback Mechanism Prevents Hematopoietic Stem Cell Exhaustion
Source: PubMed Central journal article supplement — Cell Stem Cell. 2018 Jun 1;22(6):879–892.e6. doi: 10.1016/j.stem.2018.05.003 (PMC5988582; doi:10.1016/j.stem.2018.05.003), 2018-06-01
Supplement: mmc1.pdf [file mmc1.pdf]

**Cell Stem Cell, Volume 22**

**Supplemental Information**

**An ERK-Dependent Feedback Mechanism Prevents  
Hematopoietic Stem Cell Exhaustion**

**Christian Baumgartner, Stefanie Toifl, Matthias Farlik, Florian Halbritter, Ruth Scheicher, Irmgard Fischer, Veronika Sexl, Christoph Bock, and Manuela Baccarini**

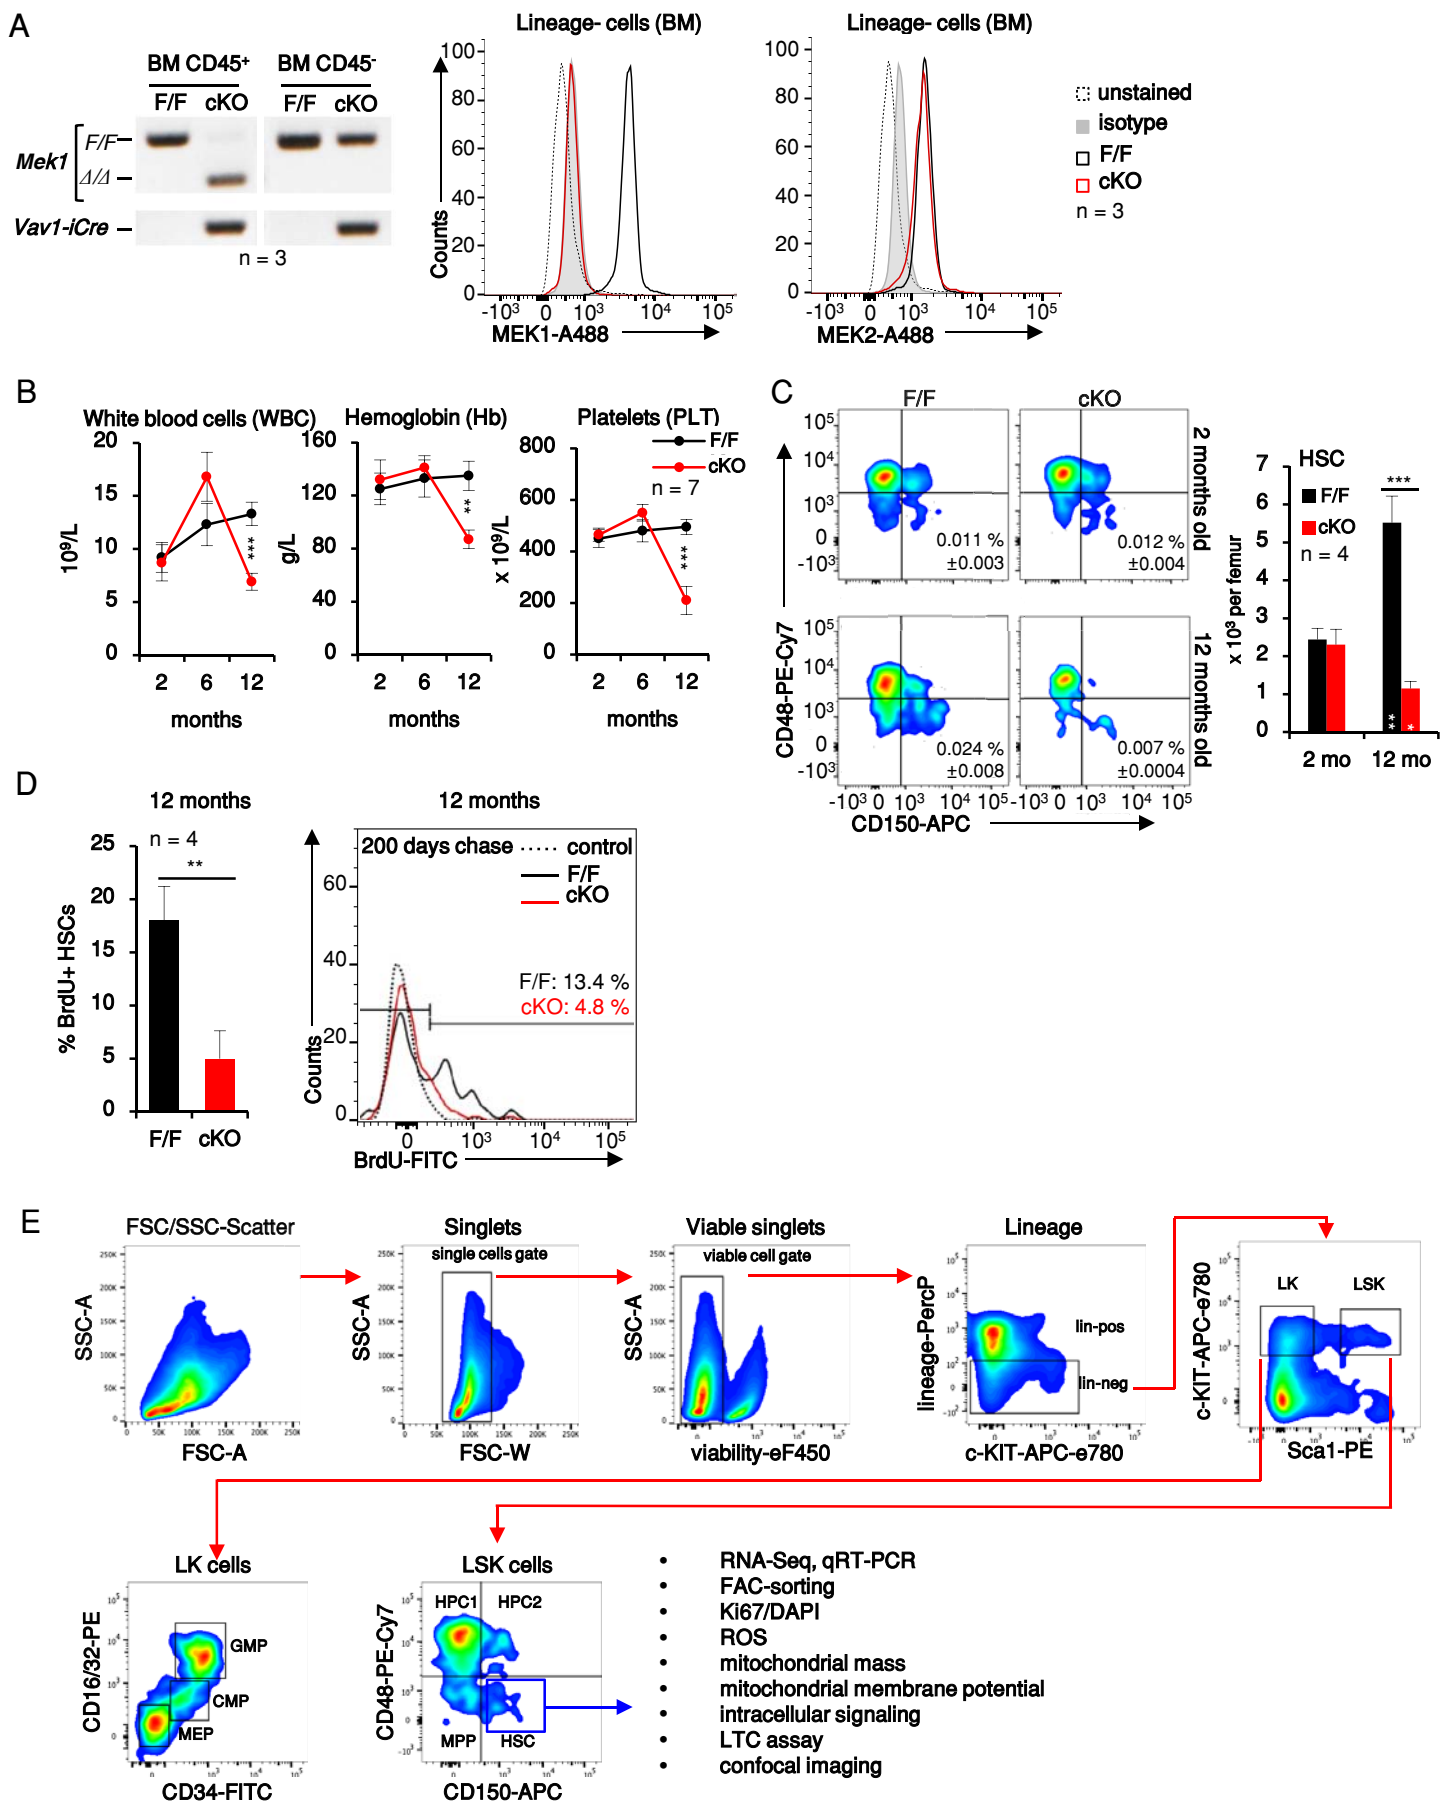

**Figure S1. Related to Figure 1**

**MEK1 protects the hematopoietic compartment during ageing.** **A**, Efficient MEK1 deletion in BM cells. Left, PCR genotyping of CD45<sup>+</sup> (hematopoietic cells) and CD45<sup>-</sup> (stroma) bone marrow cells; right, FACS analysis of MEK1 and MEK2 expression in lineage- BM cells. **B**, Blood analysis of F/F and cKO mice of different ages. **C**, Frequency (representative density plots) and number of HSCs per femur in young and aged F/F and cKO mice. **D**, % BrdU<sup>+</sup> HSCs in 12-month old mice 200 days after pulse-labelling and representative FACS histogram. **E**, Gating strategy for SLAM-marker-defined mouse HSPCs. Error bars represent the standard deviation of the mean. \**P*<0.05, \*\**P*<0.01, \*\*\**P*<0.001. White asterisks in bar graph: comparison of young versus old animals of the same genotype.

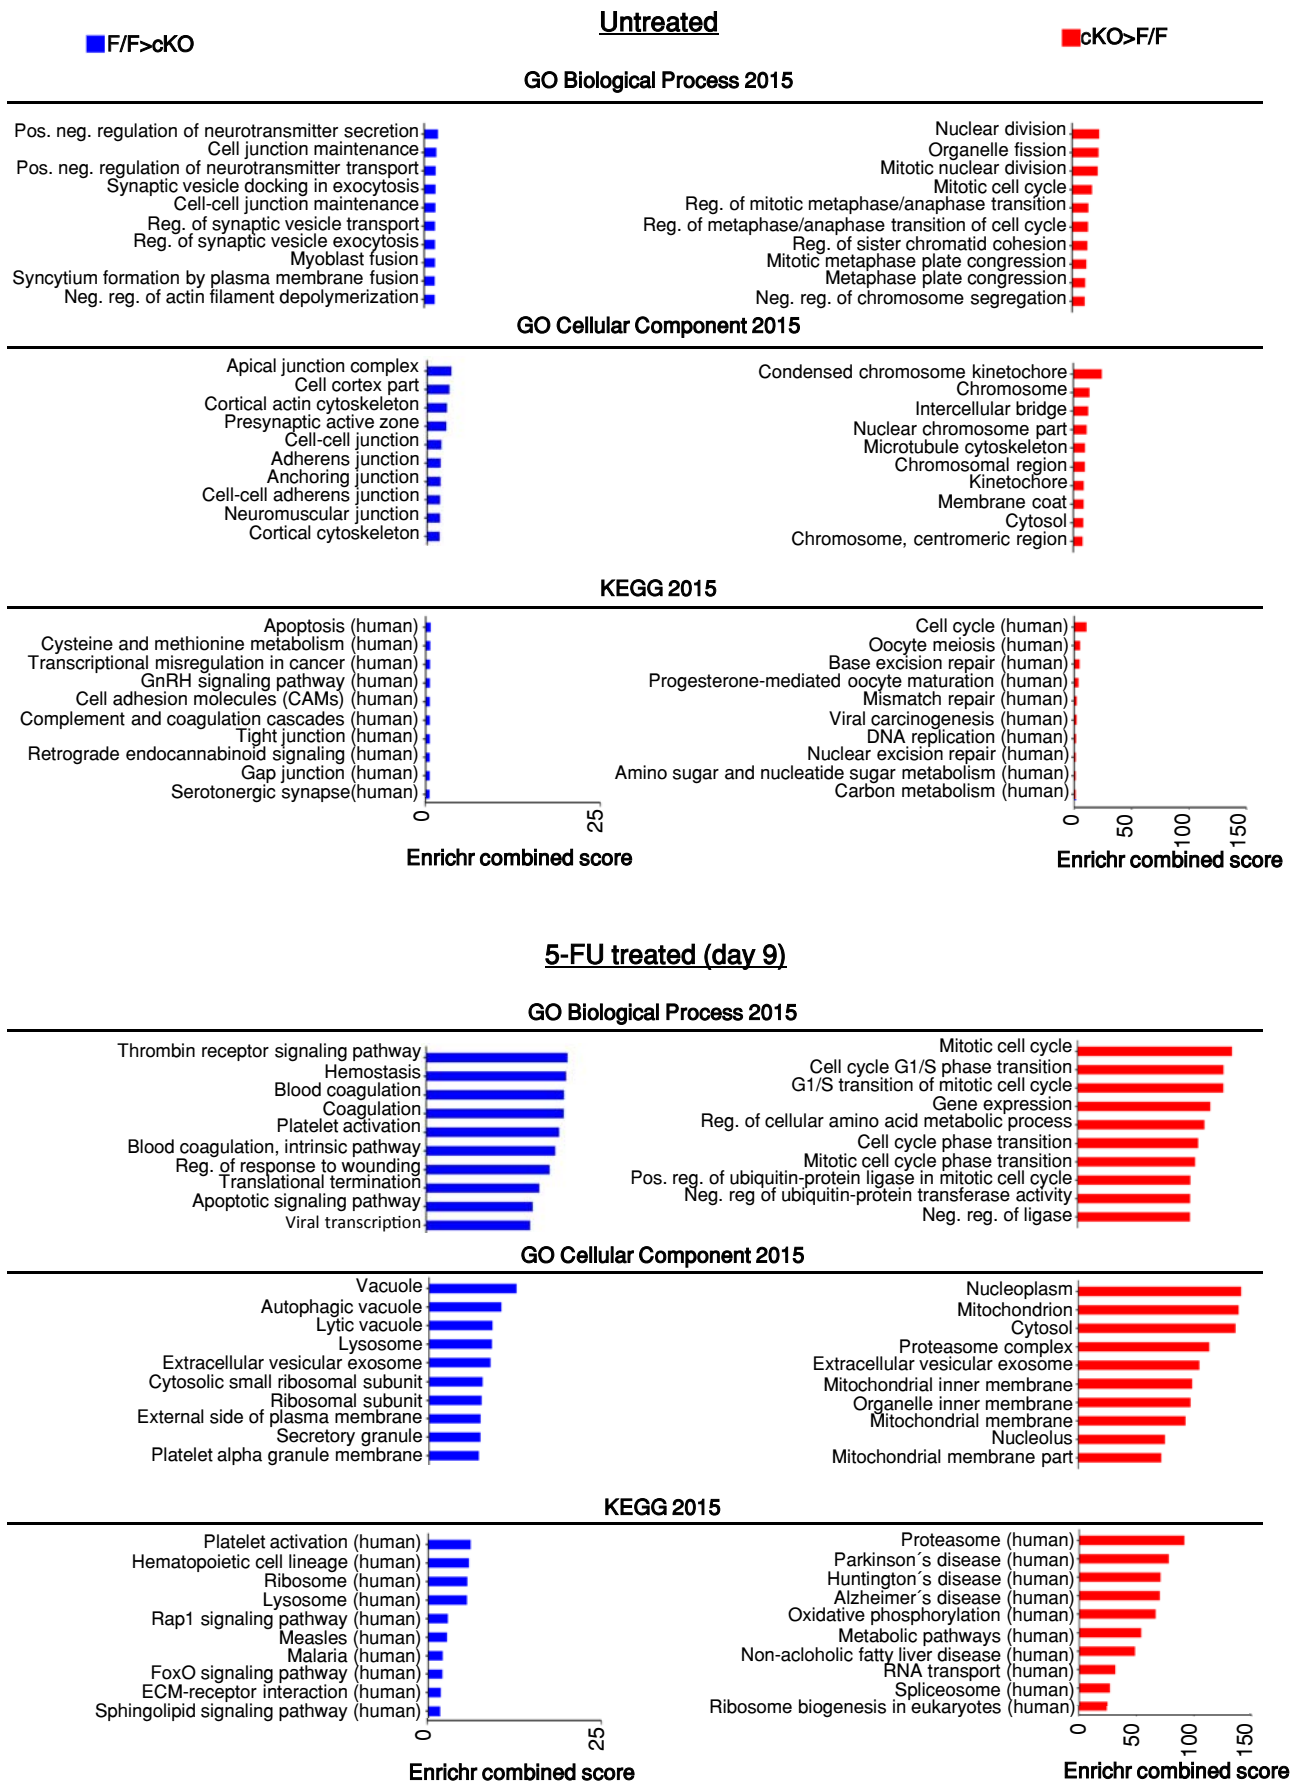

**Figure S2. Related to Figure 2**

**Functional enrichment analysis of untreated and 5-FU treated F/F versus cKO HSCs.** The top 10 terms ranked according to the combined Enrichr score (Kuleshov et al., 2016) are visualized.

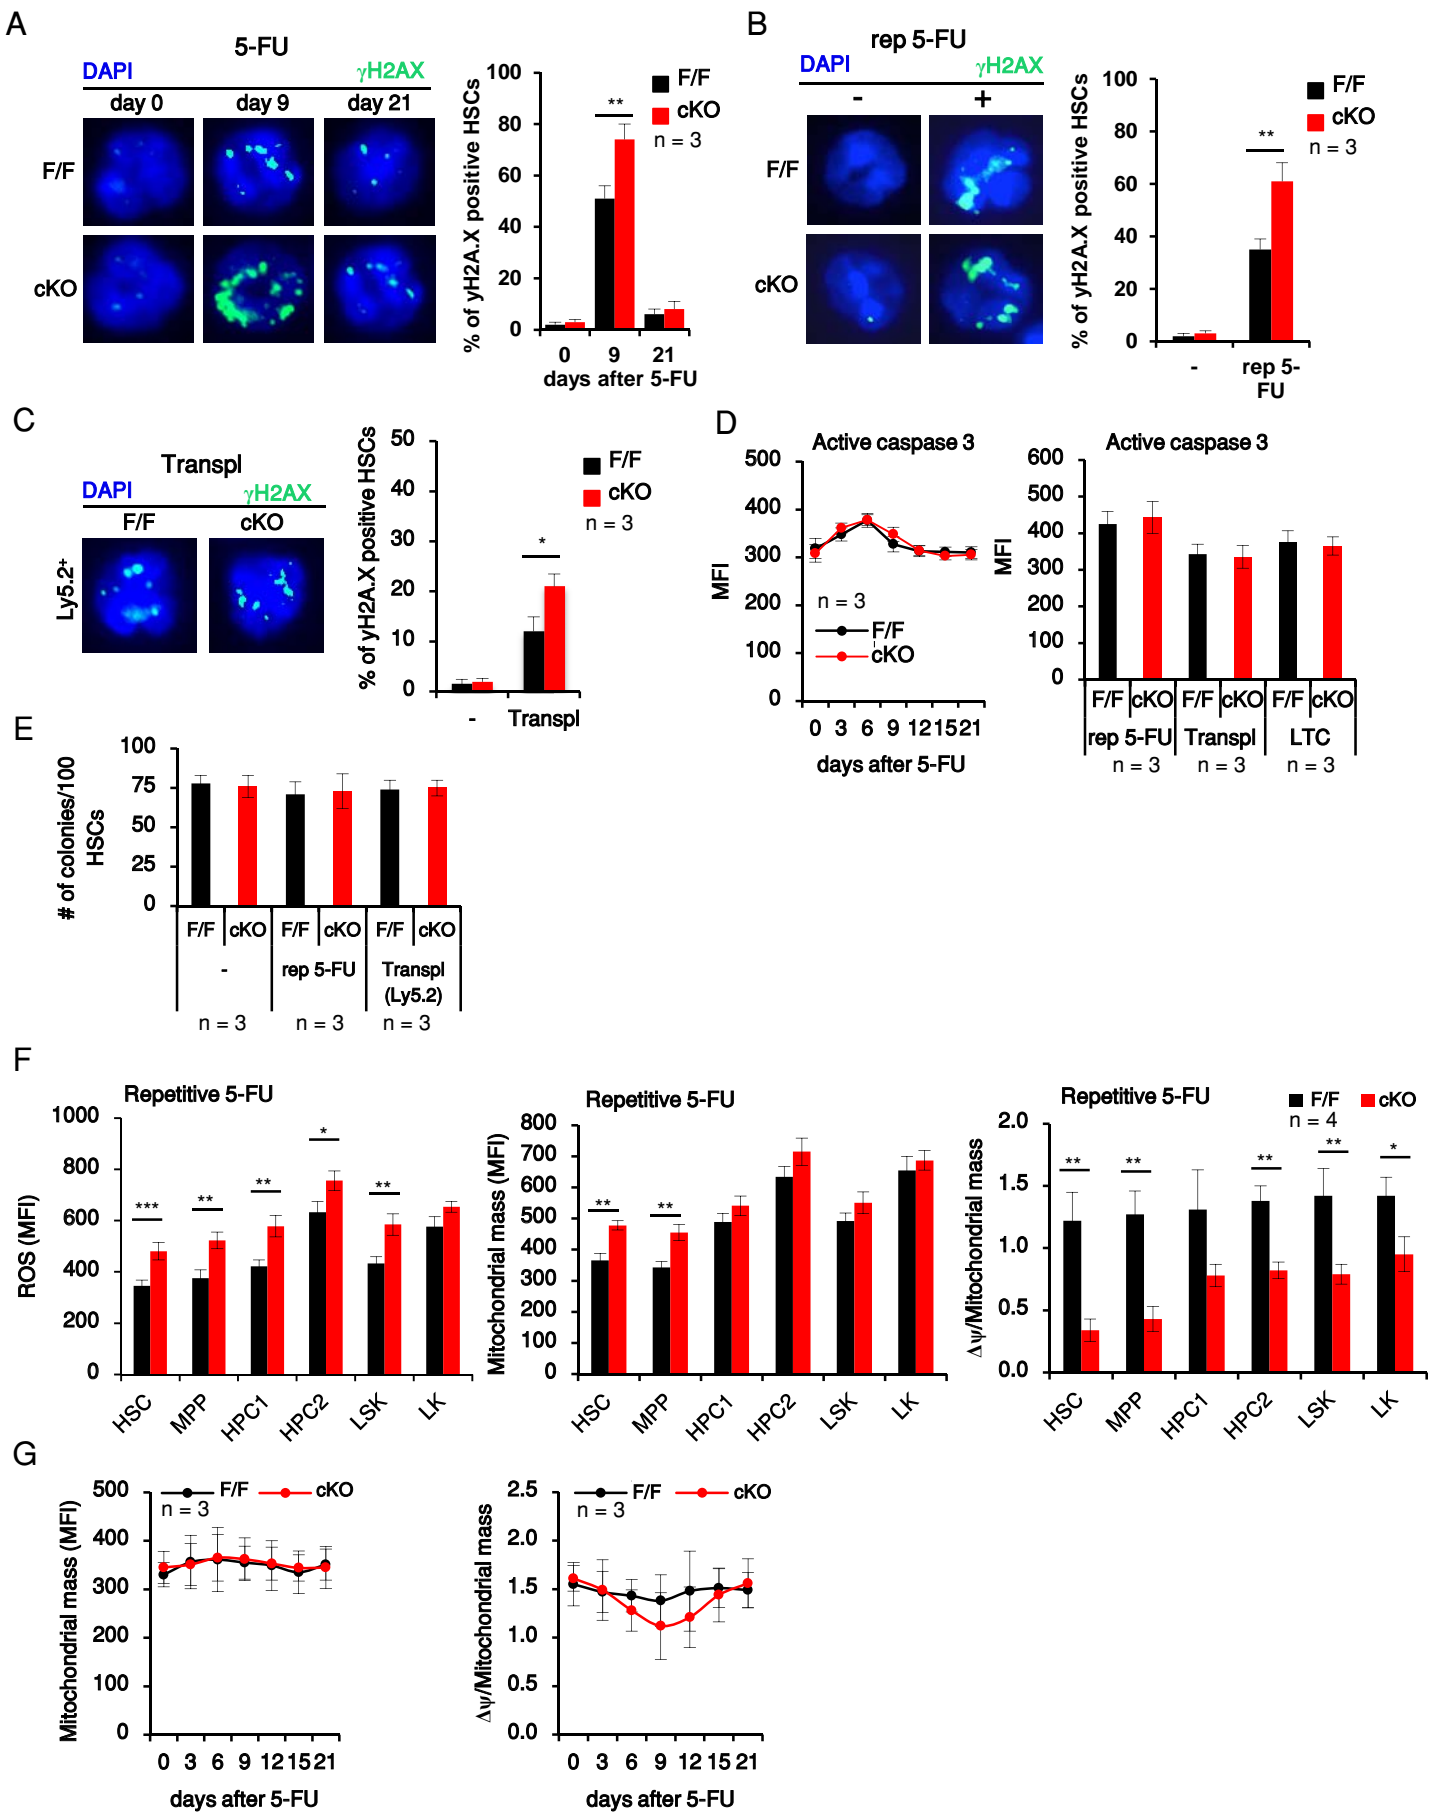

**Figure S3. Related to Figure 3**  
**DNA-damage, apoptosis, senescence, ROS levels and mitochondrial parameters in BM stem/progenitor cells from mice exposed to 5-FU or transplantation.** A-C, Hematopoietic stress increases DNA damage (left panels show representative images of γH2A.X nuclear staining, the right panels a quantification of the results), but does not induce apoptosis (D, measured as active caspase 3) or senescence (E, measured as the % of HSCs able to form colonies from a single cell) in HSCs. F, ROS levels (left), mitochondrial mass (center), and Δψ per mitochondrial mass (right) in lineage-negative BM cells from mice exposed to rep 5-FU. Gating strategy in Figure S1E. G, Mitochondrial mass (left) and Δψ per mitochondrial mass (right) in HSCs recovering from a single 5-FU injection. Error bars represent the standard deviation of the mean. \*P < 0.05, \*\*P < 0.01, \*\*\*P < 0.001.

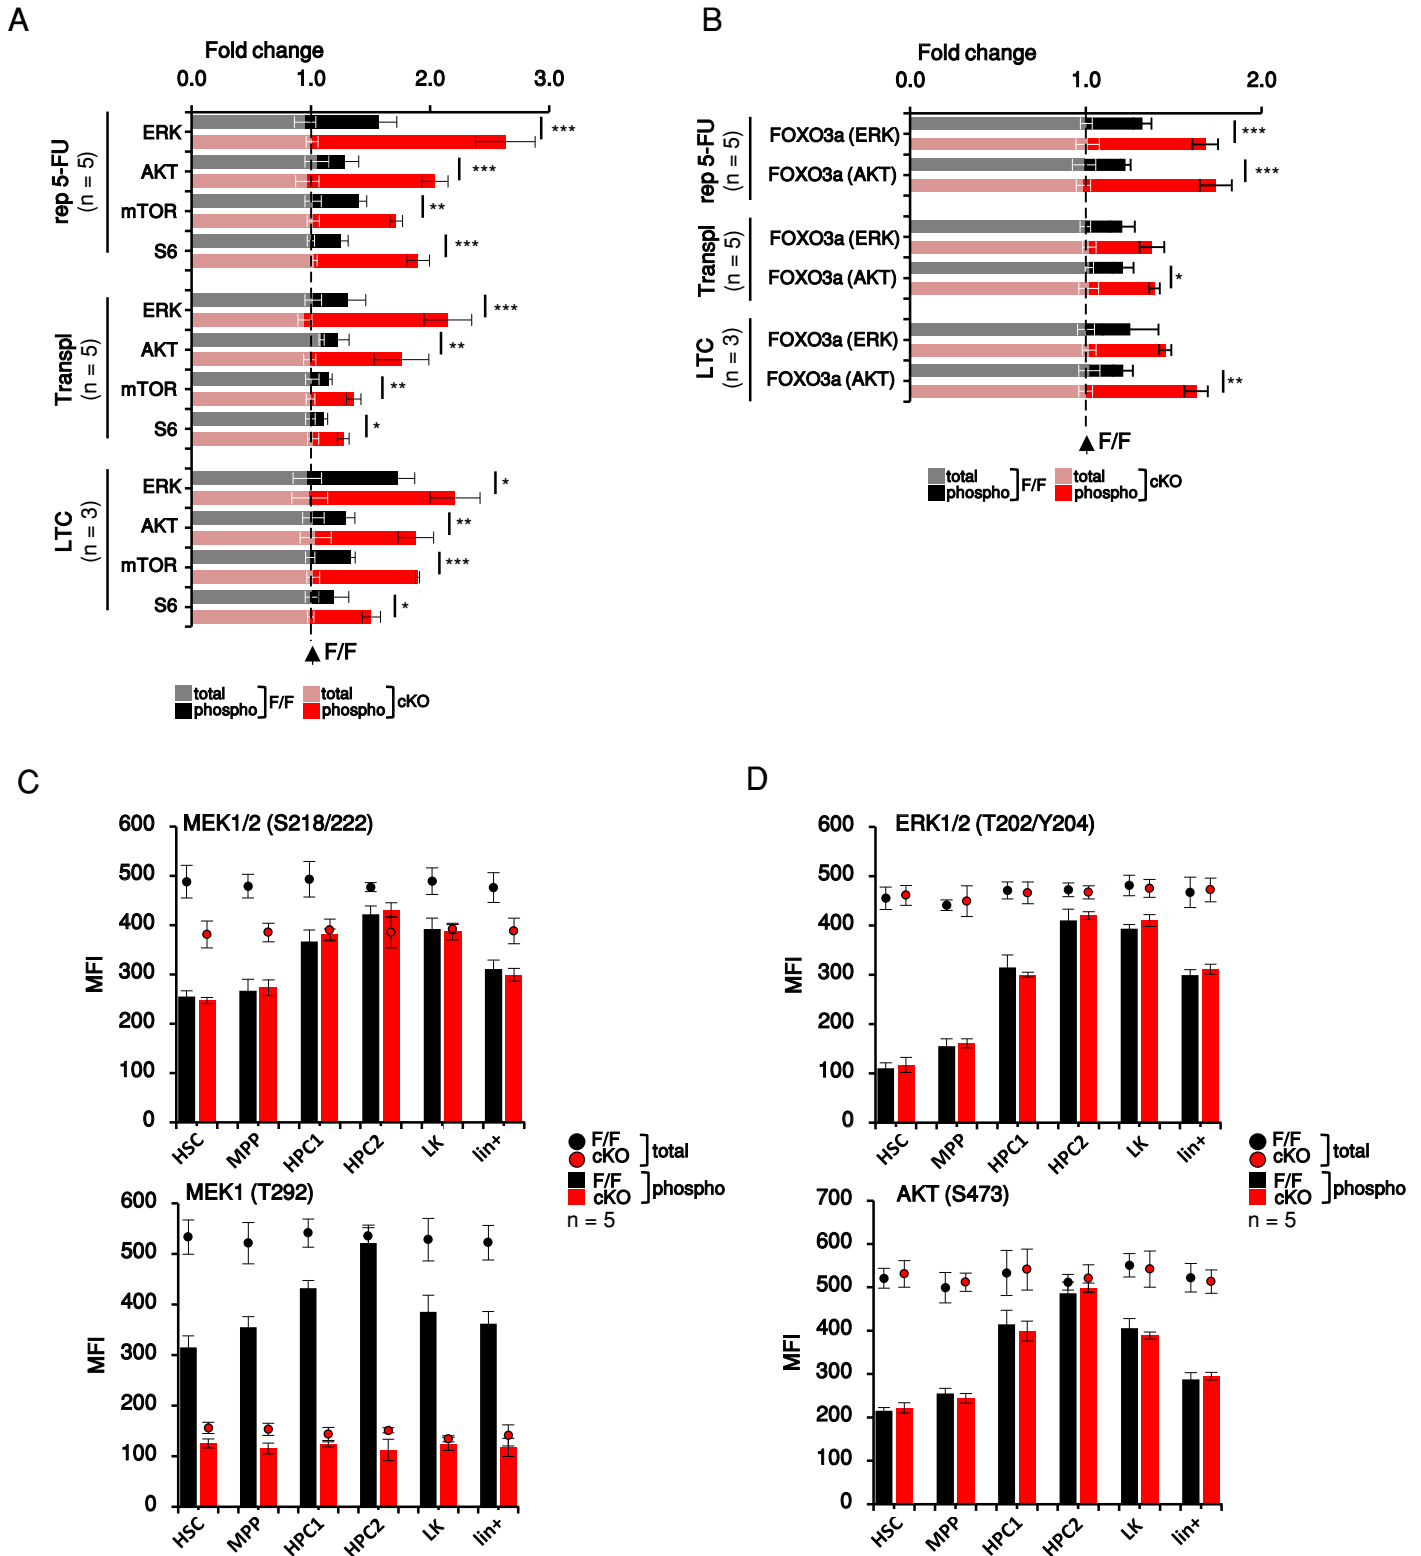

**Figure S4. Related to Figure 4**

**Signaling events in hematopoietic stem/progenitor cells.** **A**, Activation of ERK, AKT, mTOR and S6 and **B**, phosphorylation of FOXO3a in HSCs undergoing chronic stress. Data represent fold change relative to HSCs from untreated F/F mice. **C-D**, Expression and/or phosphorylation of MEK, ERK and AKT in hematopoietic stem and progenitor cells from untreated mice. Gating strategy in Figure S1E. Error bars represent the standard deviation of the mean. \* $P < 0.05$ , \*\* $P < 0.01$ , \*\*\* $P < 0.001$ .

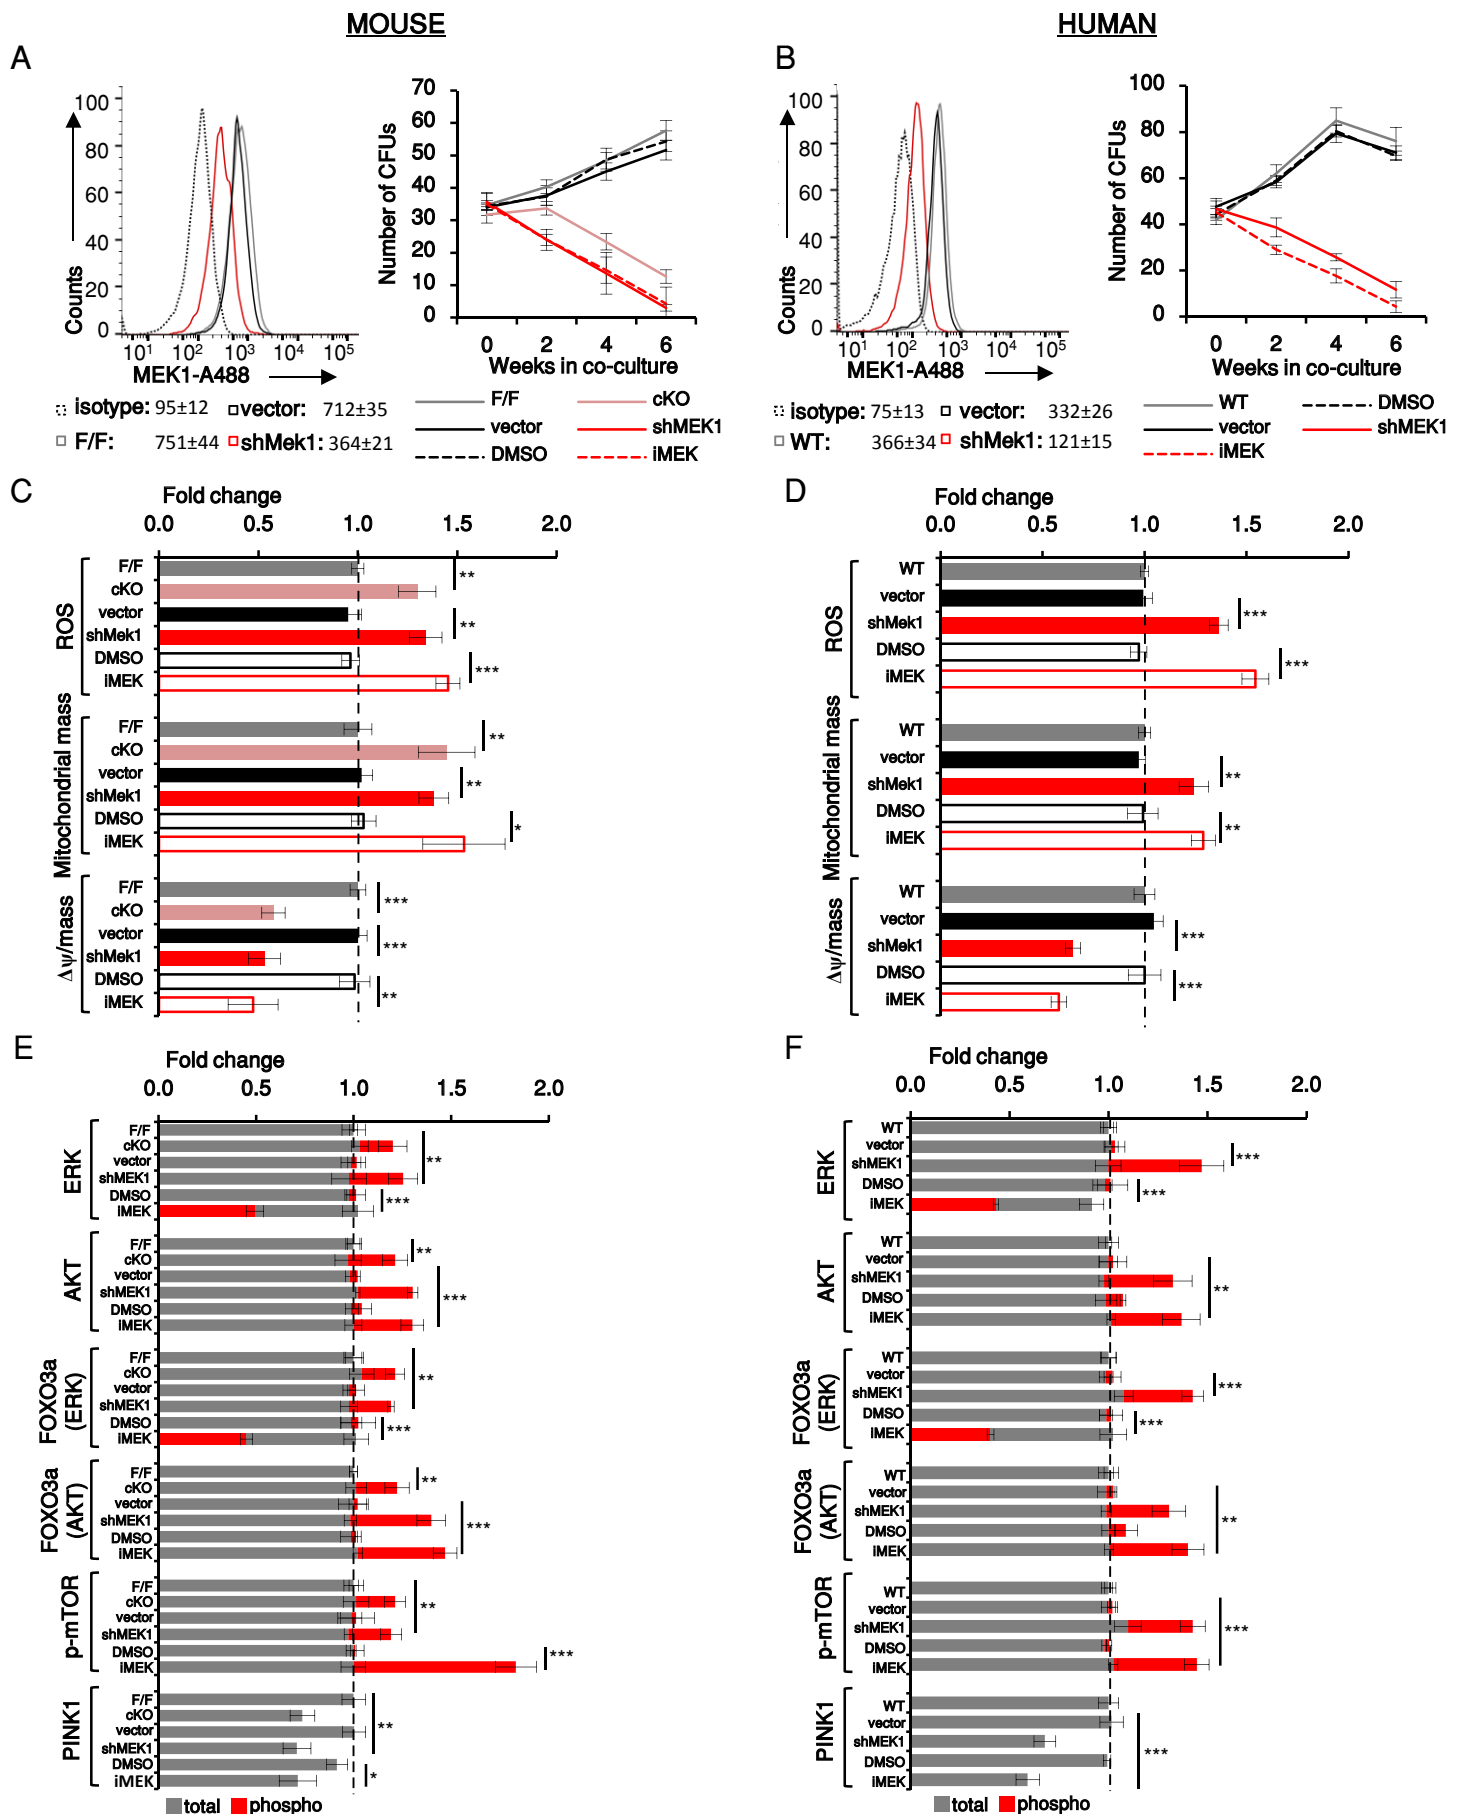

**Figure S5. Related to Figure 5**

**MEK1 silencing and MEK inhibition phenocopy the MEK1-cKO in mouse and human HSCs.** **A, B** MEK1 silencing in purified HSCs (left panels; mean fluorescence intensity (MFI) values  $\pm$  s.d. are shown below the histograms,  $n=3$ ) and CFUs derived from HSCs in LTC assays (right panels) upon MEK1 silencing or MEK inhibition (iMEK = U0126). **C, D** ROS levels, mitochondrial mass, and  $\Delta\psi$  per mitochondrial mass in mouse (**C**) and human (**D**) HSCs after 6 weeks in LTC. **E, F** Intracellular signaling (ERK, AKT, FOXO3A, mTOR) and PINK1 expression levels in the same HSCs ( $n=3$ ). Data in C-F represent fold change relative to untreated HSCs (dotted line). Error bars represent the standard deviation of the mean. \* $P<0.05$ , \*\* $P<0.01$ , \*\*\* $P<0.001$  F/F versus cKO or DMSO versus iMEK.

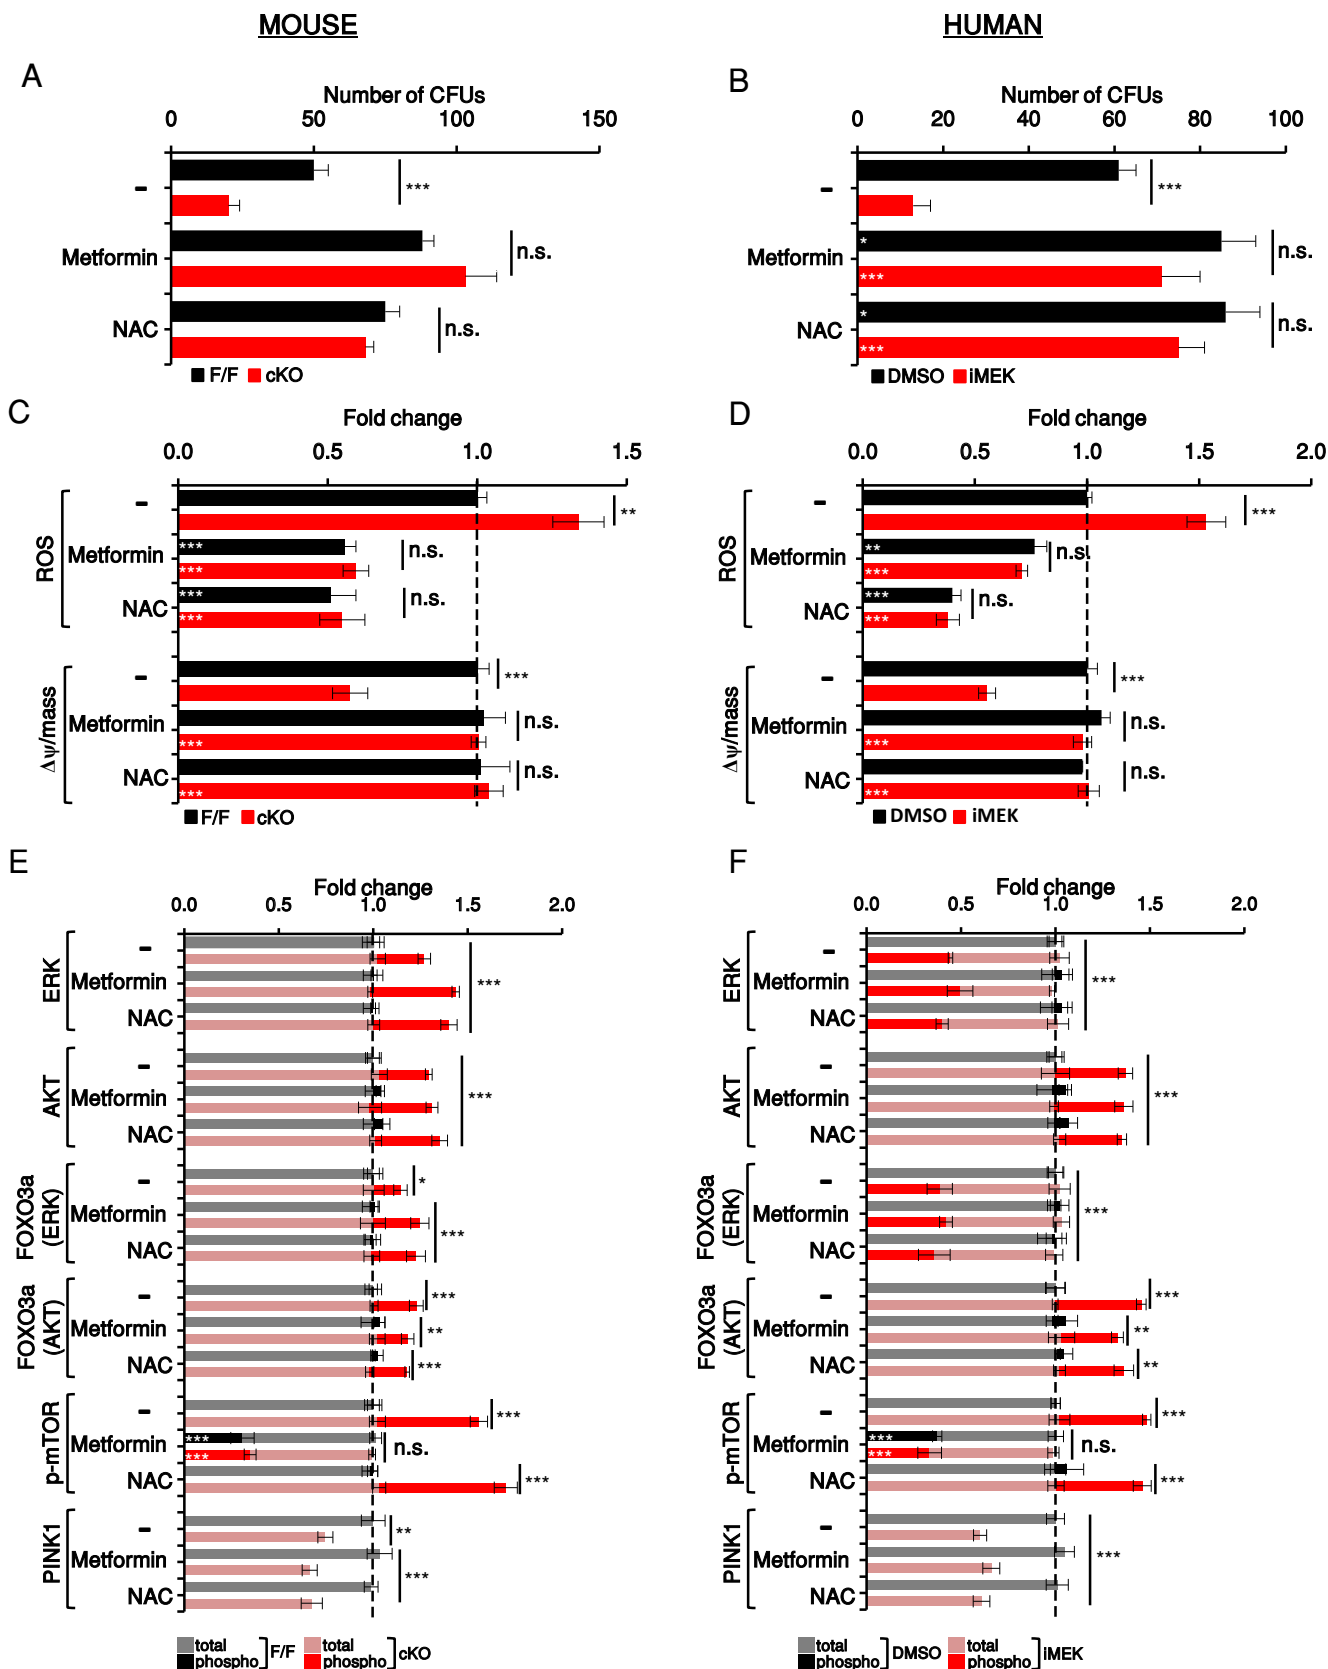

Figure S6. Related to Figure 5.

**OXPHOS or ROS inhibition promote HSC expansion and rescue the mitochondrial defects of MEK1-deficient or MEK-inhibited HSCs.** F/F and cKO HSCs (A) and human DMSO or iMEK treated HSCs (B) were treated with Metformin or NAC for 6 weeks in LTCs. A,B CFUs, C,D ROS levels and  $\Delta\psi$  per mitochondrial mass and E,F intracellular signaling were determined in these cells. Data in C-F represent fold change relative to F/F HSCs (dotted line; n=3). Error bars represent the standard deviation of the mean. \*P<0.05, \*\*P<0.01, \*\*\*P<0.001. White asterisks in bar graphs: comparison of untreated versus Metformin or NAC treated cultures.

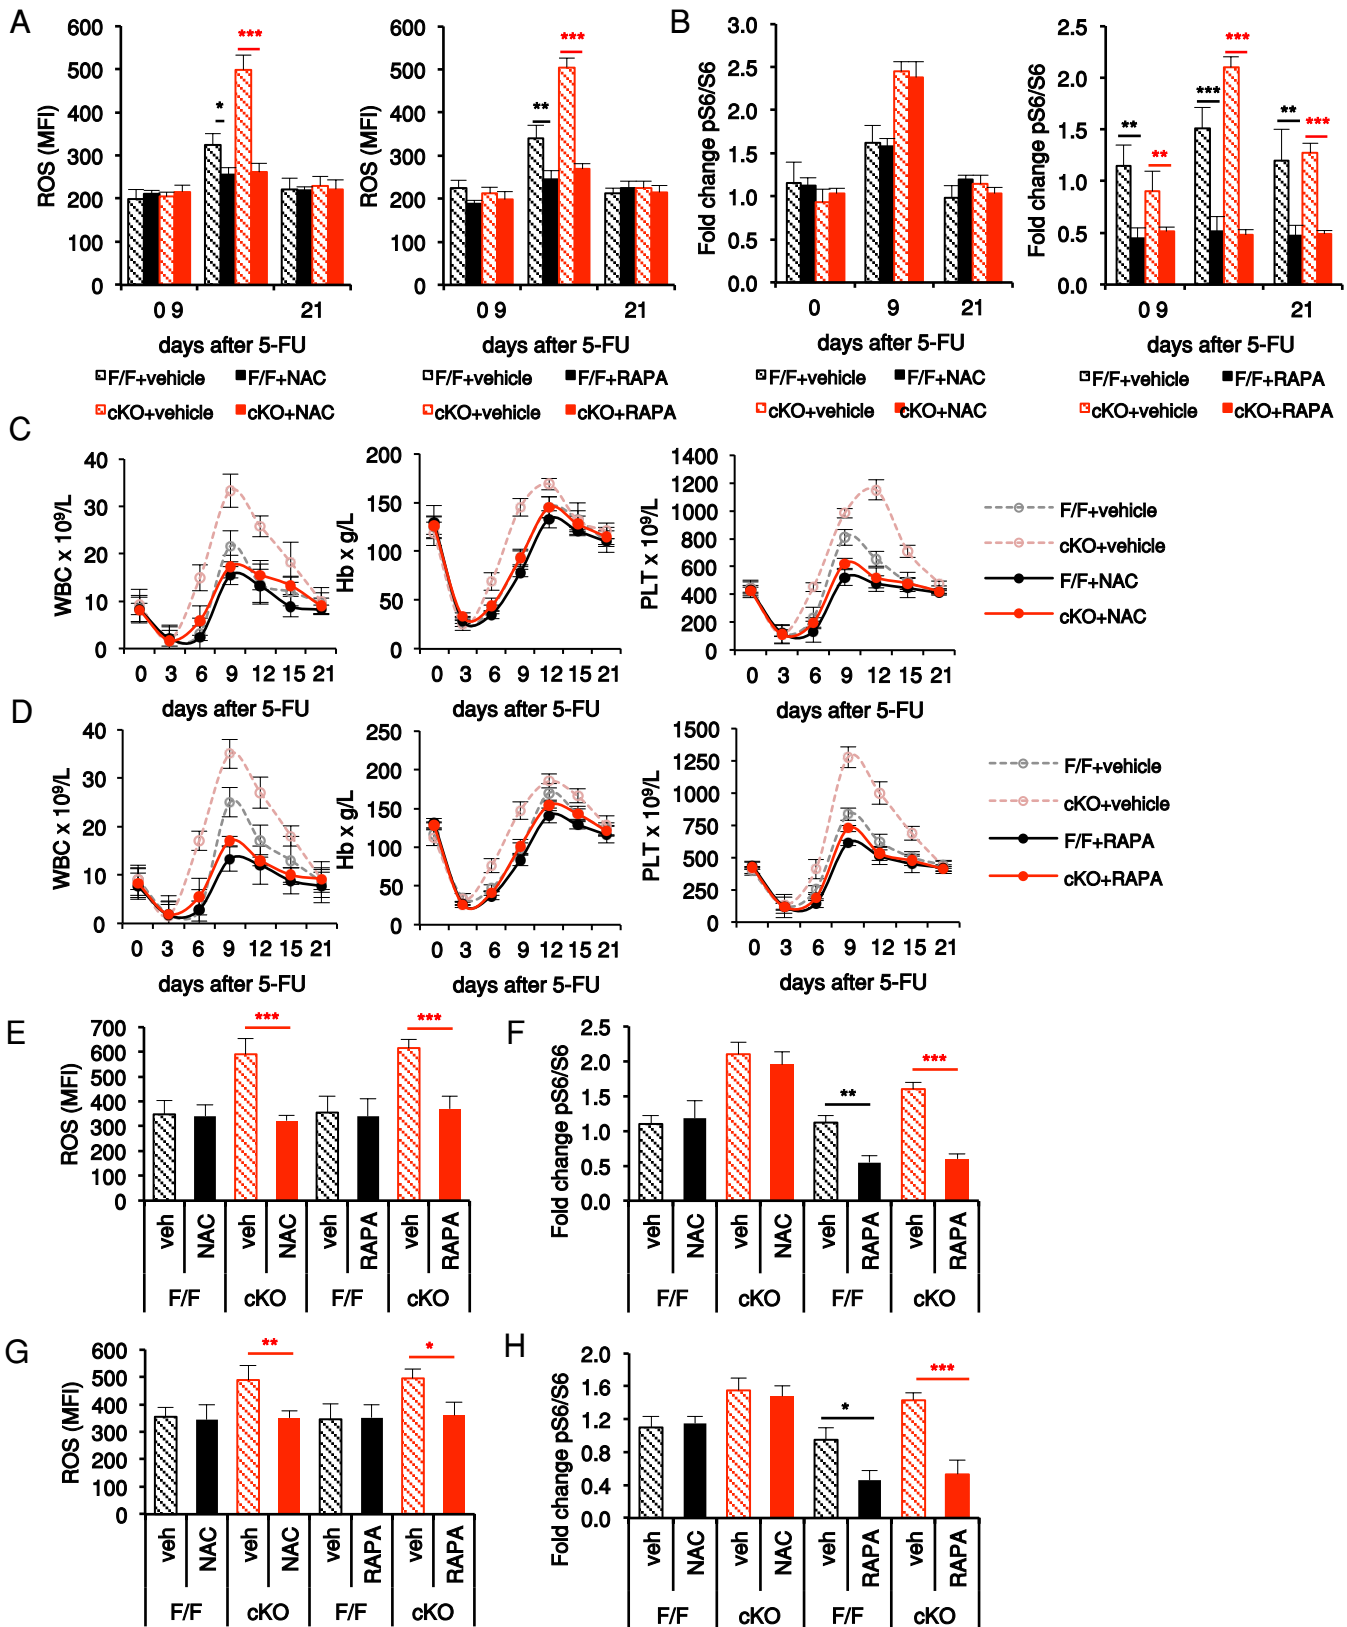

**Figure S7. Related to Figure 6.**

**Impact of NAC and Rapamycin on ROS production and S6 phosphorylation during HSC activation in vivo.**

HSC ROS and S6 phosphorylation levels (**A,B**) and peripheral blood parameters (WBC, white blood cells; Hb, hemoglobin; PLT, platelets; **C,D**) in vehicle, NAC, or Rapamycin-treated F/F and MEK1-cKO mice recovering from a single 5-FU injection. **E-H**, ROS and S6 phosphorylation levels in the HSCs of vehicle- NAC, or Rapamycin-treated F/F and MEK1-cKO mice subjected to chronic 5-FU treatment (**E,F**) or in F/F and cKO HSCs transplanted in lethally irradiated recipient mice treated with NAC or Rapamycin (**G,H**) as indicated. Error bars represent the standard deviation of the mean. \* $P < 0.05$ , \*\* $P < 0.01$ , \*\*\* $P < 0.001$  comparing vehicle versus NAC or RAPA treatment of the same genotype.



**Additional Data table S1 (separate Excel file). Related to Figure 2.**

**Full list of genes expressed in wild-type and cKO HSC isolated from untreated or 5-FU-treated mice. The list is the basis for the analysis shown in Fig. 2 and S2.**

**Table S2****List of qRT-PCR primers used in this study.** Related to STAR Methods.

| <b>qRT-PCR primer</b>   | <b>Sequence</b>                 |
|-------------------------|---------------------------------|
| <i>Actb</i> forward     | 5'-CGCCACCAGTTCGCCATGGA-3'      |
| <i>Actb</i> reverse     | 5'-TACAGCCCGGGGAGCATCGT-3'      |
| <i>Catalase</i> forward | 5'-GTCCAGTGCGCTGTAGATGTG-3'     |
| <i>Catalase</i> reverse | 5'-CCTCCTCATTCAACACCTTTGTG-3'   |
| <i>Ndufb6</i> forward   | 5'-TCGCTGTTTCTCATGTGCTT-3'      |
| <i>Ndufb6</i> reverse   | 5'-TCTCCAGTCTCCAGAATTGTATCA-3'  |
| <i>Cox5a</i> forward    | 5'-TGCCTGGGAATTGCGTAAAGGGATG-3' |
| <i>Cox5a</i> reverse    | 5'-TCAAGGCCAGCTCCTCTGGA-3'      |
| <i>Cyc1</i> forward     | 5'-AGCCTACAAGAAAGTTTGCCTAT-3'   |
| <i>Cyc1</i> reverse     | 5'-TCTTCTTCCGGTAGTGGATCTTGGC-3' |
| <i>Sdhb</i> forward     | 5'-GCTGCGTTCTTGCTGAGACA-3'      |
| <i>Sdhb</i> reverse     | 5'-ATCTCCTCCTTAGCTGTGGTT-3'     |
| <i>Atp5o</i> forward    | 5'-ACTCGGGTTTGACCTACAGC-3'      |
| <i>Atp5o</i> reverse    | 5'-GGTACTGAAGCATCGCACCT-3'      |
| <i>Sod2</i> forward     | 5'-TTAACGCGCAGATCATGCA-3'       |
| <i>Sod2</i> reverse     | 5'-GGTGGCGTTGAGATTGTTCA-3'      |
| <i>Pink1</i> forward    | 5'-GCGAAGCCATCTTAAGCAAA-3'      |
| <i>Pink1</i> reverse    | 5'-TGGGACCATCTCTGGATCTT-3'      |
| <i>Cdk4</i> forward     | 5'-ACAAGTCCCCACCTCTCCT-3'       |
| <i>Cdk4</i> reverse     | 5'-TCAGGGAGGGAAGAAGACAG-3'      |

---

|                       |                                |
|-----------------------|--------------------------------|
| <i>Ccnd1</i> forward  | 5'-GTTTCATTTCCAACCCACCCTC-3'   |
| <i>Ccnd1</i> reverse  | 5'-AGAAAGTGCGTTGTGCGGTAG-3'    |
| <i>Ccnb1</i> forward  | 5'-AAAGGGAAGCAAAAACGCTAGG-3'   |
| <i>Ccnb1</i> reverse  | 5'-TGTTCAAGTTCAGGTTTCAGGCTC-3' |
| <i>Cdkn2c</i> forward | 5'-GGCTGTCCGTTTCACTATCA-3'     |
| <i>Cdkn2c</i> reverse | 5'-TTTTGAAGGATTTGGCTGCT-3'     |
| <i>Cdkn1a</i> forward | 5'-TCCACAGCGATATCCAGACA-3'     |
| <i>Cdkn1a</i> reverse | 5'-GGACATCACCAGGATTGGAC-3'     |

---
